# Supplementary material for: Genomic alterations and possible druggable mutations in carcinoma of unknown primary (CUP)
Source: Sci Rep. 2021 Jul 23;11:15112. doi: 10.1038/s41598-021-94678-4 (PMC8302572; doi:10.1038/s41598-021-94678-4)
Supplement: Supplementary file 5 — Supplementary Information 5. [file 41598_2021_94678_MOESM5_ESM.xlsx]

## Sheet: CNA_Genes-cup
Gene	Gistic(Q-value)	Cytoband	CNA	#	Freq
CDKN2A		9p21.3	DEL	141	0.179
CDKN2B		9p21.3	DEL	130	0.106
MYC		8q24.21	AMP	54	0.044
CCND1		11q13.3	AMP	36	0.029
RB1		13q14.2	DEL	29	0.024
ERBB2		17q12	AMP	27	0.022
PTEN		10q23.31	DEL	26	0.021
CCNE1		19q12	AMP	24	0.02
FGFR1		8p11.23	AMP	24	0.02
TERT		5p15.33	AMP	24	0.02
FGF4		11q13.3	AMP	22	0.032
FGF19		11q13.3	AMP	22	0.032
SMAD4		18q21.2	DEL	21	0.017
FGF3		11q13.3	AMP	20	0.029
EGFR		7p11.2	AMP	19	0.016
SOX2		3q26.33	AMP	19	0.016
KRAS		12p12.1	AMP	18	0.015
SDHA		5p15.33	AMP	18	0.016
MTAP		9p21.3	DEL	17	0.066
CCND2		12p13.32	AMP	16	0.013
MCL1		1q21.2	AMP	16	0.013
MDM2		12q15	AMP	16	0.013
CEBPA		19q13.11	AMP	15	0.013
MET		7q31.2	AMP	15	0.012
KDM5A		12p13.33	AMP	15	0.016
CDK12		17q12	AMP	15	0.016
AKT2		19q13.2	AMP	14	0.011
PIK3CA		3q26.32	AMP	14	0.011
STK11		19p13.3	DEL	14	0.011
RECQL4		8q24.3	AMP	14	0.013
SDHC		1q23.3	AMP	13	0.011
NSD3		8p11.23	AMP	13	0.019
MYCL		1p34.2	AMP	12	0.01
DDR2		1q23.3	AMP	12	0.01
RARA		17q21.2	AMP	12	0.01
CRLF2		Xp22.33 and Yp11.2	DEL	12	0.01
RAD52		12p13.33	AMP	11	0.012
RIT1		1q22	AMP	11	0.012
NKX2-1		14q13.3	AMP	11	0.009
DCUN1D1		3q26.33	AMP	11	0.017
IL7R		5p13.2	AMP	10	0.011
PRKCI		3q26.2	AMP	10	0.01
RAD21		8q24.11	AMP	10	0.009
TGFBR2		3p24.1	DEL	10	0.014
KDM6A		Xp11.3	DEL	10	0.008
BCL2L1		20q11.21	AMP	9	0.007
FOXA1		14q21.1	AMP	9	0.01
JAK2		9p24.1	DEL	9	0.007
NTRK1		1q23.1	AMP	9	0.007
PTPRD		9p24.1-p23	DEL	9	0.01
TP53		17p13.1	DEL	9	0.007
RICTOR		5p13.1	AMP	9	0.009
BCL2		18q21.33	DEL	8	0.007
CCND3		6p21.1	AMP	8	0.007
CDK4		12q14.1	AMP	8	0.007
CDK6		7q21.2	AMP	8	0.007
CRKL		22q11.21	AMP	8	0.007
MDM4		1q32.1	AMP	8	0.007
AGO2		8q24.3	AMP	8	0.018
CD274		9p24.1	AMP	8	0.007
CYSLTR2		13q14.2	DEL	8	0.018
HIST2H3C		1q21.2	AMP	8	0.014
HIST2H3D		1q21.2	AMP	8	0.014
BCL6		3q27.3	AMP	7	0.006
E2F3		6p22.3	AMP	7	0.011
GNAS		20q13.32	AMP	7	0.006
JAK2		9p24.1	AMP	7	0.006
SMAD2		18q21.1	DEL	7	0.006
SMARCA4		19p13.2	DEL	7	0.006
SOX9		17q24.3	AMP	7	0.006
SRC		20q11.23	AMP	7	0.007
TEK		9p21.2	DEL	7	0.015
TP63		3q28	AMP	7	0.011
IRS2		13q34	AMP	7	0.01
KMT2B		19q13.12	AMP	7	0.016
YAP1		11q22.1	AMP	7	0.008
CD274		9p24.1	DEL	7	0.006
ASXL1		20q11.21	AMP	7	0.006
DNMT1		19p13.2	AMP	6	0.009
FGFR2		10q26.13	AMP	6	0.005
GATA3		10p14	DEL	6	0.005
GLI1		12q13.3	AMP	6	0.005
NF1		17q11.2	DEL	6	0.005
NKX3-1		8p21.2	DEL	6	0.007
PDGFRA		4q12	AMP	6	0.005
BAP1		3p21.1	DEL	6	0.005
MAP3K13		3q27.2	AMP	6	0.009
KEAP1		19p13.2	DEL	6	0.005
FOXP1		3p13	DEL	6	0.009
RTEL1		20q13.33	AMP	6	0.014
PDCD1LG2		9p24.1	DEL	6	0.006
BIRC3		11q22.2	AMP	5	0.008
ARAF		Xp11.3	DEL	5	0.004
AXL		19q13.2	AMP	5	0.004
B2M		15q21.1	DEL	5	0.004
PRDM1		6q21	AMP	5	0.004
BRCA2		13q13.1	DEL	5	0.004
EIF1AX		Xp22.12	DEL	5	0.008
EIF4A2		3q27.3	AMP	5	0.008
ETV6		12p13.2	AMP	5	0.004
FAT1		4q35.2	DEL	5	0.005
GATA1		Xp11.23	DEL	5	0.007
GATA3		10p14	AMP	5	0.004
GATA4		8p23.1	DEL	5	0.009
IL10		1q32.1	AMP	5	0.008
KDR		4q12	AMP	5	0.004
KIT		4q12	AMP	5	0.004
MITF		3p13	DEL	5	0.004
MYCN		2p24.3	AMP	5	0.004
NBN		8q21.3	AMP	5	0.004
NFKBIA		14q13.2	AMP	5	0.004
NOTCH2		1p12	AMP	5	0.004
PRKN		6q26	DEL	5	0.004
MAPK1		22q11.22	AMP	5	0.004
MAP2K4		17p12	DEL	5	0.004
SMARCA4		19p13.2	AMP	5	0.004
AURKA		20q13.2	AMP	5	0.004
ELOC		8q21.11	AMP	5	0.006
ZRSR2		Xp22.2	DEL	5	0.004
RBM10		Xp11.3	DEL	5	0.005
IKBKE		1q32.1	AMP	5	0.007
KEAP1		19p13.2	AMP	5	0.004
MALT1		18q21.32	DEL	5	0.008
DIS3		13q21.33	DEL	5	0.004
DROSHA		5p13.3	AMP	5	0.011
BCOR		Xp11.4	DEL	5	0.004
PDCD1LG2		9p24.1	AMP	5	0.005
KLLN		10q23.31	DEL	5	0.019
AR		Xq12	AMP	4	0.003
BCL2		18q21.33	AMP	4	0.003
BCL6		3q27.3	DEL	4	0.003
CD79B		17q23.3	AMP	4	0.003
CDKN1B		12p13.1	DEL	4	0.003
DNMT3B		20q11.21	AMP	4	0.006
EPHA3		3p11.1	DEL	4	0.004
ERCC2		19q13.32	AMP	4	0.003
FGFR3		4p16.3	AMP	4	0.003
GATA6		18q11.2	AMP	4	0.007
DNAJB1		19p13.12	AMP	4	0.007
IDH2		15q26.1	AMP	4	0.003
IGF1R		15q26.3	AMP	4	0.003
IRF4		6p25.3	AMP	4	0.006
JAK3		19p13.11	AMP	4	0.003
NOTCH3		19p13.12	AMP	4	0.004
NRAS		1p13.2	AMP	4	0.003
PGR		11q22.1	AMP	4	0.007
PIK3C2G		12p12.3	AMP	4	0.006
PIM1		6p21.2	AMP	4	0.003
PMAIP1		18q21.32	DEL	4	0.006
PPP2R1A		19q13.41	AMP	4	0.004
ROS1		6q22.1	DEL	4	0.003
ROS1		6q22.1	AMP	4	0.003
SRSF2		17q25.1	AMP	4	0.003
SMARCB1		22q11.23|22q11	DEL	4	0.003
TCF3		19p13.3	DEL	4	0.003
VEGFA		6p21.1	AMP	4	0.005
YES1		18p11.32	AMP	4	0.006
CXCR4		2q22.1	DEL	4	0.005
KDM5C		Xp11.22	DEL	4	0.003
IKZF3		17q12-q21.1	AMP	4	0.014
DIS3		13q21.33	AMP	4	0.003
CIC		19q13.2	AMP	4	0.004
BRD4		19p13.12	AMP	4	0.003
PBRM1		3p21.1	DEL	4	0.003
PAK5		20p12.2	AMP	4	0.006
RRAGC		1p34.3	AMP	4	0.009
SOX17		8q11.23	AMP	4	0.006
CDC73		1q31.2	AMP	4	0.003
DOT1L		19p13.3	DEL	4	0.006
AMER1		Xq11.2	DEL	4	0.006
FLCN		17p11.2	AMP	4	0.003
NEIL2		8p23.1	DEL	4	0.016
FAS		10q23.31	DEL	3	0.005
AR		Xq12	DEL	3	0.002
ATM		11q22.3	DEL	3	0.002
ATRX		Xq21.1	DEL	3	0.002
PRDM1		6q21	DEL	3	0.002
BMPR1A		10q23.2	DEL	3	0.003
BRAF		7q34	AMP	3	0.002
RUNX1T1		8q21.3	AMP	3	0.01
CD79A		19q13.2	AMP	3	0.005
CDH1		16q22.1	DEL	3	0.002
CDKN1A		6p21.2	AMP	3	0.003
CDKN1B		12p13.1	AMP	3	0.002
CDKN2C		1p32.3	AMP	3	0.002
CSF3R		1p34.3	AMP	3	0.003
CYLD		16q12.1	DEL	3	0.003
DUSP4		8p12	DEL	3	0.007
EPHA5		4q13.1-q13.2	AMP	3	0.003
EPHA7		6q16.1	DEL	3	0.003
ERBB3		12q13.2	AMP	3	0.002
ERCC4		16p13.12	AMP	3	0.003
ERCC5		13q33.1	AMP	3	0.003
ERF		19q13.2	AMP	3	0.007
EXT1		8q24.11	AMP	3	0.006
FGFR1		8p11.23	DEL	3	0.002
FOXO1		13q14.11	DEL	3	0.005
GNA11		19p13.3	DEL	3	0.002
H3F3A		1q42.12	AMP	3	0.003
HGF		7q21.11	AMP	3	0.004
LYN		8q12.1	AMP	3	0.006
SMAD2		18q21.1	AMP	3	0.002
MAX		14q23.3	DEL	3	0.003
MEN1		11q13.1	DEL	3	0.002
MPL		1p34.2	AMP	3	0.002
MYD88		3p22.2	AMP	3	0.002
NF2		22q12.2	DEL	3	0.002
NTRK3		15q25.3	AMP	3	0.002
PAX5		9p13.2	DEL	3	0.002
PDGFRB		5q32	AMP	3	0.002
PIK3C3		18q12.3	DEL	3	0.004
PIK3CG		7q22.3	AMP	3	0.004
PIK3R2		19p13.11	AMP	3	0.004
PPARG		3p25.2	AMP	3	0.004
PTK2		8q24.3	AMP	3	0.011
PTPRD		9p24.1-p23	AMP	3	0.003
RAD51B		14q24.1	DEL	3	0.004
RAF1		3p25.2	AMP	3	0.002
RECQL		12p12.1	AMP	3	0.007
RET		10q11.21	DEL	3	0.002
SMARCB1		22q11.23|22q11	AMP	3	0.002
SS18		18q11.2	DEL	3	0.012
STAT6		12q13.3	AMP	3	0.006
HNF1A		12q24.31	AMP	3	0.003
TMPRSS2		21q22.3	DEL	3	0.003
VHL		3p25.3	AMP	3	0.002
PTP4A1		6q12	AMP	3	0.007
CSDE1		1p13.2	AMP	3	0.007
KAT6A		8p11.21	AMP	3	0.01
TNFRSF14		1p36.32	DEL	3	0.004
NCOR1		17p12-p11.2	DEL	3	0.004
MED12		Xq13.1	DEL	3	0.003
IKZF1		7p12.2	DEL	3	0.002
YAP1		11q22.1	DEL	3	0.003
CARM1		19p13.2	AMP	3	0.007
PTPRT		20q12-q13.11	AMP	3	0.005
CIC		19q13.2	DEL	3	0.003
MGA		15q15.1	DEL	3	0.003
RYBP		3p13	DEL	3	0.005
SUZ12		17q11.2	AMP	3	0.003
SETBP1		18q12.3	DEL	3	0.006
SETD2		3p21.31	DEL	3	0.002
BCOR		Xp11.4	AMP	3	0.002
FBXW7		4q31.3	DEL	3	0.002
PRDM14		8q13.3	AMP	3	0.007
COP1		1q25.1-q25.2	AMP	3	0.003
ZNF703		8p11.23	AMP	3	0.061
PREX2		8q13.2	AMP	3	0.006
NUF2		1q23.3	AMP	3	0.007
BRIP1		17q23.2	AMP	3	0.002
ARID5B		10q21.2	DEL	3	0.005
CARD11		7p22.2	AMP	3	0.002
KLHL6		3q27.1	AMP	3	0.061
H3F3C		12p11.21	AMP	3	0.005
MEF2B		19p13.11	AMP	3	0.002
PARP1		1q42.12	AMP	2	0.003
AKT1		14q32.33	AMP	2	0.002
ALOX12B		17p13.1	AMP	2	0.002
APC		5q22.2	DEL	2	0.002
BIRC3		11q22.2	DEL	2	0.003
XIAP		Xq25	DEL	2	0.003
ARAF		Xp11.3	AMP	2	0.002
ATR		3q23	AMP	2	0.002
BLM		15q26.1	AMP	2	0.002
BRCA2		13q13.1	AMP	2	0.002
BTK		Xq22.1	DEL	2	0.003
CALR		19p13.13	AMP	2	0.002
RUNX1		21q22.12	AMP	2	0.002
CDH1		16q22.1	AMP	2	0.002
CDKN2B		9p21.3	AMP	2	0.002
CHD4		12p13.31	AMP	2	0.047
CTNNB1		3p22.1	AMP	2	0.002
DMD		Xp21.2-p21.1	DEL	2	0.007
DNMT3A		2p23.3	DEL	2	0.002
DNMT3A		2p23.3	AMP	2	0.002
EP300		22q13.2	DEL	2	0.002
EPHA5		4q13.1-q13.2	DEL	2	0.002
ERCC5		13q33.1	DEL	2	0.002
ERF		19q13.2	DEL	2	0.005
ERG		21q22.2	DEL	2	0.002
ESR1		6q25.1-q25.2	AMP	2	0.002
ETV4		17q21.31	AMP	2	0.003
ETV6		12p13.2	DEL	2	0.002
EXT2		11p11.2	AMP	2	0.004
FANCA		16q24.3	DEL	2	0.002
PTK2B		8p21.2	DEL	2	0.008
FANCG		9p13.3	AMP	2	0.003
FGF6		12p13.32	AMP	2	0.041
FGFR3		4p16.3	DEL	2	0.002
FH		1q43	AMP	2	0.002
FLT1		13q12.3	AMP	2	0.002
FLT3		13q12.2	DEL	2	0.002
FLT3		13q12.2	AMP	2	0.002
FYN		6q21	DEL	2	0.003
GATA4		8p23.1	AMP	2	0.003
GNA11		19p13.3	AMP	2	0.002
GNAS		20q13.32	DEL	2	0.002
GRIN2A		16p13.2	AMP	2	0.003
HIST1H2BD		6p22.2	DEL	2	0.003
HRAS		11p15.5	AMP	2	0.002
INHBA		7p14.1	AMP	2	0.003
INPPL1		11q13.4	DEL	2	0.005
INPPL1		11q13.4	AMP	2	0.005
INSR		19p13.2	DEL	2	0.003
SH2D1A		Xq25	DEL	2	0.002
SMAD4		18q21.2	AMP	2	0.002
MITF		3p13	AMP	2	0.002
MLH1		3p22.2	DEL	2	0.002
MLH1		3p22.2	AMP	2	0.002
MUTYH		1p34.1	AMP	2	0.002
MYBL1		8q13.1	AMP	2	0.004
MYOD1		11p15.1	AMP	2	0.003
NF1		17q11.2	AMP	2	0.002
NF2		22q12.2	AMP	2	0.002
NOTCH1		9q34.3	AMP	2	0.002
NOTCH2		1p12	DEL	2	0.002
NTRK3		15q25.3	DEL	2	0.002
PAX5		9p13.2	AMP	2	0.002
PDCD1		2q37.3	DEL	2	0.003
PIK3C2B		1q32.1	AMP	2	0.003
PIK3CD		1p36.22	DEL	2	0.003
PMAIP1		18q21.32	AMP	2	0.003
PRKDC		8q11.21	AMP	2	0.003
MAP2K2		19p13.3	DEL	2	0.002
PTPRS		19p13.3	DEL	2	0.003
RAC2		22q13.1	DEL	2	0.005
RAD51		15q15.1	DEL	2	0.002
RAD51D		17q12	AMP	2	0.002
RAF1		3p25.2	DEL	2	0.002
RASA1		5q14.3	DEL	2	0.002
RECQL		12p12.1	DEL	2	0.005
RET		10q11.21	AMP	2	0.002
SMO		7q32.1	AMP	2	0.002
STK11		19p13.3	AMP	2	0.002
HNF1A		12q24.31	DEL	2	0.002
TCF7L2		10q25.2-q25.3	DEL	2	0.002
TOP1		20q12	AMP	2	0.003
TP53		17p13.1	AMP	2	0.002
U2AF1		21q22.3	DEL	2	0.002
U2AF1		21q22.3	AMP	2	0.002
NSD2		4p16.3	AMP	2	0.003
WRN		8p12	DEL	2	0.004
WT1		11p13	DEL	2	0.002
YES1		18p11.32	DEL	2	0.003
FGF23		12p13.32	AMP	2	0.041
KMT2D		12q13.12	DEL	2	0.002
NCOA3		20q13.12	AMP	2	0.003
HIST3H3		1q42.13	AMP	2	0.003
HIST1H3D		6p22.2	DEL	2	0.003
HIST1H3E		6p22.2	DEL	2	0.003
HIST1H3H		6p22.1	AMP	2	0.003
SPOP		17q21.33	DEL	2	0.002
PPM1D		17q23.2	AMP	2	0.002
TNFRSF14		1p36.32	AMP	2	0.003
PHOX2B		4p13	DEL	2	0.002
RPS6KA4		11q13.1	DEL	2	0.003
LATS1		6q25.1	AMP	2	0.003
AURKB		17p13.1	AMP	2	0.002
AKT3		1q43-q44	AMP	2	0.002
SH2B3		12q24.12	AMP	2	0.002
STAG2		Xq25	DEL	2	0.002
FRS2		12q15	AMP	2	0.047
PRAME		22q11.22	AMP	2	0.007
ADGRA2		8p11.23	AMP	2	0.041
GREM1		15q13.3	DEL	2	0.002
BBC3		19q13.32	AMP	2	0.003
SESN1		6q21	DEL	2	0.005
BABAM1		19p13.11	AMP	2	0.003
TENT5C		1p12	AMP	2	0.002
NSD3		8p11.23	DEL	2	0.003
SDHAF2		11q12.2	DEL	2	0.002
SHQ1		3p13	DEL	2	0.003
ARID1B		6q25.3	DEL	2	0.002
CRLF2		Xp22.33 and Yp11.2	AMP	2	0.002
COP1		1q25.1-q25.2	DEL	2	0.002
CDC73		1q31.2	DEL	2	0.002
VTCN1		1p13.1-p12	AMP	2	0.003
TCF7L1		2p11.2	AMP	2	0.007
STK40		1p34.3	AMP	2	0.003
KNSTRN		15q15.1	DEL	2	0.005
PPP4R2		3p13	DEL	2	0.005
SPRED1		15q14	DEL	2	0.005
FLCN		17p11.2	DEL	2	0.002
CADM2		3p12.1	DEL	2	0.009
ABL1		9q34.12	DEL	1	<0.1%
ACVR1B		12q13.13	AMP	1	0.023
AKT1		14q32.33	DEL	1	<0.1%
AKT2		19q13.2	DEL	1	<0.1%
ALK		2p23.2-p23.1	DEL	1	<0.1%
ALK		2p23.2-p23.1	AMP	1	<0.1%
XIAP		Xq25	AMP	1	0.002
ZFHX3		16q22.2-q22.3	DEL	1	0.002
ATRX		Xq21.1	AMP	1	<0.1%
AXL		19q13.2	DEL	1	<0.1%
BARD1		2q35	DEL	1	0.001
BMPR1A		10q23.2	AMP	1	<0.1%
BRCA1		17q21.31	DEL	1	<0.1%
BRCA1		17q21.31	AMP	1	<0.1%
BRAF		7q34	DEL	1	<0.1%
BTK		Xq22.1	AMP	1	0.001
BUB1B		15q15.1	DEL	1	0.002
CASP8		2q33.1	DEL	1	0.001
CASP8		2q33.1	AMP	1	0.001
CBFB		16q22.1	DEL	1	0.001
CBFB		16q22.1	AMP	1	0.001
CCND2		12p13.32	DEL	1	<0.1%
CD79A		19q13.2	DEL	1	0.002
CD79B		17q23.3	DEL	1	<0.1%
CDK1		10q21.2	DEL	1	0.004
CDK1		10q21.2	AMP	1	0.004
CDK5		7q36.1	AMP	1	0.004
CDK8		13q12.13	AMP	1	0.001
CDK9		9q34.11	AMP	1	0.004
CDKN1C		11p15.4	AMP	1	0.002
CDKN2A		9p21.3	AMP	1	0.001
CDKN2C		1p32.3	DEL	1	<0.1%
CEBPA		19q13.11	DEL	1	<0.1%
CENPA		2p23.3	AMP	1	0.002
CHEK1		11q24.2	AMP	1	0.001
CREBBP		16p13.3	AMP	1	<0.1%
CSF1R		5q32	DEL	1	0.001
CSF1R		5q32	AMP	1	0.001
CTLA4		2q33.2	AMP	1	0.001
CTNNB1		3p22.1	DEL	1	<0.1%
CUX1		7q22.1	AMP	1	0.002
DDB2		11p11.2	AMP	1	0.002
DNMT1		19p13.2	DEL	1	0.002
E2F3		6p22.3	DEL	1	0.002
ELF3		1q32.1	AMP	1	0.002
EPHA3		3p11.1	AMP	1	0.001
ERBB4		2q34	DEL	1	<0.1%
ERG		21q22.2	AMP	1	0.001
ETV1		7p21.2	AMP	1	<0.1%
ETV5		3q27.2	AMP	1	0.002
EZH2		7q36.1	AMP	1	<0.1%
FANCD2		3p25.3	AMP	1	0.002
FANCE		6p21.31	AMP	1	0.002
FANCF		11p14.3	AMP	1	0.002
FGF4		11q13.3	DEL	1	0.001
FGFR2		10q26.13	DEL	1	<0.1%
FGFR4		5q35.2	AMP	1	<0.1%
FH		1q43	DEL	1	<0.1%
FLT1		13q12.3	DEL	1	<0.1%
FLT4		5q35.3	DEL	1	<0.1%
FLT4		5q35.3	AMP	1	<0.1%
FUS		16p11.2	AMP	1	0.002
GATA1		Xp11.23	AMP	1	0.001
GATA6		18q11.2	DEL	1	0.002
GBA		1q22	AMP	1	0.004
GLI2		2q14.2	DEL	1	0.002
GLI2		2q14.2	AMP	1	0.002
GNAQ		9q21.2	AMP	1	<0.1%
GPS2		17p13.1	DEL	1	0.002
GRIN2A		16p13.2	DEL	1	0.001
GSK3B		3q13.33	DEL	1	0.001
MSH6		2p16.3	DEL	1	<0.1%
MSH6		2p16.3	AMP	1	<0.1%
HIST1H1C		6p22.2	DEL	1	0.002
H3F3B		17q25.1	AMP	1	0.001
NRG1		8p12	DEL	1	0.004
HLA-A		6p22.1	AMP	1	0.002
HLA-B		6p21.33	DEL	1	0.002
HLA-B		6p21.33	AMP	1	0.002
ID3		1p36.12	AMP	1	<0.1%
ID4		6p22.3	AMP	1	0.004
IDH1		2q34	AMP	1	<0.1%
IFNGR1		6q23.3	AMP	1	0.002
INHA		2q35	DEL	1	0.002
INPP4A		2q11.2	AMP	1	0.002
IRF4		6p25.3	DEL	1	0.001
JAK1		1p31.3	AMP	1	0.001
JUN		1p32.1	AMP	1	0.001
KEL		7q34	AMP	1	0.023
KRAS		12p12.1	DEL	1	<0.1%
LIG4		13q33.3	AMP	1	0.004
LMO1		11p15.4	AMP	1	<0.1%
LMO2		11p13	AMP	1	0.002
LYN		8q12.1	DEL	1	0.002
EPCAM		2p21	DEL	1	0.001
EPCAM		2p21	AMP	1	0.001
MAX		14q23.3	AMP	1	0.001
MDM4		1q32.1	DEL	1	<0.1%
MEN1		11q13.1	AMP	1	<0.1%
MET		7q31.2	DEL	1	<0.1%
CIITA		16p13.13	AMP	1	0.002
MRE11		11q21	DEL	1	0.001
MRE11		11q21	AMP	1	0.001
MSH2		2p21-p16.3	DEL	1	<0.1%
MSH2		2p21-p16.3	AMP	1	<0.1%
MSH3		5q14.1	DEL	1	0.002
MST1		3p21.31	DEL	1	0.002
MST1R		3p21.31	DEL	1	0.002
MUTYH		1p34.1	DEL	1	<0.1%
MYB		6q23.3	AMP	1	0.002
MYBL1		8q13.1	DEL	1	0.002
MYCL		1p34.2	DEL	1	<0.1%
MYCN		2p24.3	DEL	1	<0.1%
MYOD1		11p15.1	DEL	1	0.002
NPM1		5q35.1	DEL	1	<0.1%
NRAS		1p13.2	DEL	1	<0.1%
NTHL1		16p13.3	DEL	1	0.001
NTRK1		1q23.1	DEL	1	<0.1%
NTRK2		9q21.33	AMP	1	<0.1%
DDR2		1q23.3	DEL	1	<0.1%
PAK1		11q13.5-q14.1	AMP	1	0.002
PDGFRB		5q32	DEL	1	<0.1%
PIK3C2G		12p12.3	DEL	1	0.001
PIK3CA		3q26.32	DEL	1	<0.1%
PIK3CB		3q22.3	AMP	1	0.001
PIK3R1		5q13.1	AMP	1	<0.1%
PLCG2		16q23.3	DEL	1	0.002
PMS1		2q32.2	DEL	1	<0.1%
PMS2		7p22.1	AMP	1	<0.1%
POLB		8p11.21	DEL	1	0.004
POLB		8p11.21	AMP	1	0.004
POLD1		19q13.33	AMP	1	0.001
POLE		12q24.33	AMP	1	0.001
PPARG		3p25.2	DEL	1	0.001
PRF1		10q22.1	AMP	1	0.002
PRKAR1A		17q24.2	AMP	1	<0.1%
PRKCZ		1p36.33	AMP	1	0.004
MAPK1		22q11.22	DEL	1	<0.1%
MAP2K1		15q22.31	DEL	1	<0.1%
MAP2K2		19p13.3	AMP	1	0.001
PSMD13		11p15.5	AMP	1	0.004
PTPN14		1q32.3-q41	AMP	1	0.004
RAC1		7p22.1	AMP	1	0.001
RAD21		8q24.11	DEL	1	<0.1%
RAD51C		17q22	AMP	1	0.001
UPF1		19p13.11	AMP	1	0.002
RHEB		7q36.1	AMP	1	<0.1%
RPS6KB2		11q13.2	DEL	1	0.002
RPS6KB2		11q13.2	AMP	1	0.002
RRAS		19q13.33	AMP	1	0.002
SDHC		1q23.3	DEL	1	<0.1%
SDHD		11q23.1	AMP	1	<0.1%
MAP2K4		17p12	AMP	1	<0.1%
SMARCD1		12q13.12	DEL	1	0.001
SMARCE1		17q21.2	AMP	1	0.004
SOX2		3q26.33	DEL	1	<0.1%
SPTA1		1q23.1	AMP	1	0.023
STAT3		17q21.2	AMP	1	<0.1%
TCF3		19p13.3	AMP	1	<0.1%
TCF7L2		10q25.2-q25.3	AMP	1	<0.1%
TGFBR2		3p24.1	AMP	1	0.001
NKX2-1		14q13.3	DEL	1	<0.1%
TMPRSS2		21q22.3	AMP	1	0.001
TNFAIP3		6q23.3	AMP	1	<0.1%
TP53BP1		15q15.3	DEL	1	0.001
TRAF3		14q32.32	DEL	1	0.004
TSC1		9q34.13	DEL	1	<0.1%
TSC2		16p13.3	DEL	1	<0.1%
TSC2		16p13.3	AMP	1	<0.1%
TSHR		14q31.1	AMP	1	0.001
VHL		3p25.3	DEL	1	<0.1%
WT1		11p13	AMP	1	<0.1%
XPO1		2p15	DEL	1	<0.1%
XPO1		2p15	AMP	1	<0.1%
XRCC2		7q36.1	DEL	1	0.001
KAT6A		8p11.21	DEL	1	0.003
KMT2D		12q13.12	AMP	1	<0.1%
ZRSR2		Xp22.2	AMP	1	<0.1%
KDM5C		Xp11.22	AMP	1	<0.1%
SMC1A		Xp11.22	AMP	1	0.004
ARID1A		1p36.11	DEL	1	<0.1%
ARID1A		1p36.11	AMP	1	<0.1%
AXIN1		16p13.3	DEL	1	0.001
AXIN1		16p13.3	AMP	1	0.001
AXIN2		17q24.1	DEL	1	0.001
AXIN2		17q24.1	AMP	1	0.001
BAP1		3p21.1	AMP	1	<0.1%
HIST1H3A		6p22.2	DEL	1	0.002
HIST1H3D		6p22.2	AMP	1	0.002
HIST1H3C		6p22.2	DEL	1	0.001
HIST1H3E		6p22.2	AMP	1	0.002
HIST1H3I		6p22.1	AMP	1	0.002
HIST1H3G		6p22.2	DEL	1	0.002
HIST1H3G		6p22.2	AMP	1	0.002
HIST1H3J		6p22.1	AMP	1	0.002
HIST1H3B		6p22.2	DEL	1	0.001
SPOP		17q21.33	AMP	1	0.001
RAD54L		1p34.1	AMP	1	0.001
PIK3R3		1p34.1	AMP	1	0.002
TP63		3q28	DEL	1	0.002
SOCS1		16p13.13	AMP	1	<0.1%
EED		11q14.2	AMP	1	0.001
INPP4B		4q31.21	AMP	1	0.001
CCN6		6q21	AMP	1	0.02
FUBP1		1p31.1	AMP	1	0.001
BCL10		1p22.3	DEL	1	0.002
PHOX2B		4p13	AMP	1	<0.1%
HIST1H3F		6p22.2	DEL	1	0.002
HIST1H3F		6p22.2	AMP	1	0.002
RNF8		6p21.2	AMP	1	0.004
USP8		15q21.2	AMP	1	0.004
SMC3		10q25.2	DEL	1	0.002
EXO1		1q43	AMP	1	0.004
BABAM2		2p23.2	DEL	1	0.004
NCOR1		17p12-p11.2	AMP	1	0.001
MDC1		6p21.33	AMP	1	0.002
MED12		Xq13.1	AMP	1	0.001
AKT3		1q43-q44	DEL	1	<0.1%
BCL2L11		2q13	DEL	1	0.002
RAD50		5q31.1	DEL	1	0.001
STAG1		3q22.3	DEL	1	0.004
IKZF1		7p12.2	AMP	1	<0.1%
HOXB13		17q21.32	AMP	1	0.001
CARM1		19p13.2	DEL	1	0.002
NPRL2		3p21.31	DEL	1	0.005
CTCF		16q22.1	DEL	1	0.001
CTCF		16q22.1	AMP	1	0.001
MALT1		18q21.32	AMP	1	0.002
PNRC1		6q15	DEL	1	0.001
CHEK2		22q12.1	AMP	1	<0.1%
RRAS2		11p15.2	AMP	1	0.002
KDM6B		17p13.1	AMP	1	0.004
ICOSLG		21q22.3	AMP	1	0.002
CRTC1		19p13.11	AMP	1	0.002
DICER1		14q32.13	DEL	1	<0.1%
DICER1		14q32.13	AMP	1	<0.1%
RYBP		3p13	AMP	1	0.002
SF3B1		2q33.1	DEL	1	<0.1%
SF3B1		2q33.1	AMP	1	<0.1%
BRD4		19p13.12	DEL	1	<0.1%
SUZ12		17q11.2	DEL	1	<0.1%
PRAME		22q11.22	DEL	1	0.004
PRPF40B		12q13.12	AMP	1	0.004
RAD54B		8q22.1	AMP	1	0.004
WWTR1		3q25.1	AMP	1	0.002
ADGRA2		8p11.23	DEL	1	0.02
MLH3		14q24.3	DEL	1	0.004
FOXP1		3p13	AMP	1	0.001
SETD2		3p21.31	AMP	1	<0.1%
UBE2T		1q32.1	AMP	1	0.004
DROSHA		5p13.3	DEL	1	0.002
ANKRD11		16q24.3	DEL	1	0.002
SUFU		10q24.32	DEL	1	<0.1%
LRP1B		2q22.1-q22.2	DEL	1	0.02
ERRFI1		1p36.23	DEL	1	0.002
EGLN1		1q42.2	AMP	1	0.004
RNF43		17q22	DEL	1	0.001
RNF43		17q22	AMP	1	0.001
SHQ1		3p13	AMP	1	0.002
ASXL2		2p23.3	AMP	1	0.002
RHOT1		17q11.2	AMP	1	0.004
FBXW7		4q31.3	AMP	1	<0.1%
LMO3		12p12.3	DEL	1	0.004
PAK5		20p12.2	DEL	1	0.001
KMT2C		7q36.1	DEL	1	0.001
KMT2C		7q36.1	AMP	1	0.001
BCORL1		Xq26.1	AMP	1	0.002
SOX17		8q11.23	DEL	1	0.002
NSD1		5q35.3	DEL	1	0.001
SMYD3		1q44	AMP	1	0.002
VTCN1		1p13.1-p12	DEL	1	0.002
PALB2		16p12.2	AMP	1	<0.1%
TET1		10q21.3	DEL	1	0.001
TET1		10q21.3	AMP	1	0.001
CD276		15q24.1	AMP	1	0.002
NECTIN4		1q23.3	AMP	1	0.004
BCL2L12		19q13.33	AMP	1	0.002
BRIP1		17q23.2	DEL	1	<0.1%
ZNRF3		22q12.1	DEL	1	0.003
ARID5B		10q21.2	AMP	1	0.002
CARD11		7p22.2	DEL	1	<0.1%
RHPN2		19q13.11	AMP	1	0.004
CCNQ		Xq28	DEL	1	0.002
MSI2		17q22	AMP	1	0.002
AMER1		Xq11.2	AMP	1	0.001
SESN3		11q21	DEL	1	0.002
SESN3		11q21	AMP	1	0.002
PPP4R2		3p13	AMP	1	0.002
ASXL1		20q11.21	DEL	1	<0.1%
ARID2		12q12	DEL	1	<0.1%
ARID2		12q12	AMP	1	<0.1%
NEIL2		8p23.1	AMP	1	0.004
CADM2		3p12.1	AMP	1	0.005
NEGR1		1p31.1	DEL	1	0.001
RSPO2		8q23.1	AMP	1	0.003
